# Supplementary material for: Child health and the implementation of Community and District-management Empowerment for Scale-up (CODES) in Uganda: a randomised controlled trial
Source: HighWire-hosted journal article supplement (doi:10.1136/bmjgh-2021-006084), 2021-06-01
Supplement: bmjgh-2021-006084supp006_data_supplement.pdf [file bmjgh-2021-006084supp006_data_supplement.pdf]

**Supplement Table 3: Implementation of the Three Pillars of CODES in Each Implementing District (i.e. Dosage and timing of implementation)**

| Pillar of intervention                                            | Apac                                                 | Arua                                                 | Bugiri                                               | Buweju                                               | Buvuma                                               | Luuka                                                | Maracha                                              | Masindi                                              |
|-------------------------------------------------------------------|------------------------------------------------------|------------------------------------------------------|------------------------------------------------------|------------------------------------------------------|------------------------------------------------------|------------------------------------------------------|------------------------------------------------------|------------------------------------------------------|
| <b>Pillar 1*</b>                                                  |                                                      |                                                      |                                                      |                                                      |                                                      |                                                      |                                                      |                                                      |
| LQAS data collection baseline*                                    | 09/12/2013                                           | 09/12/2013                                           | 09/12/2013                                           | 09/12/2013                                           | 09/12/2013                                           | 09/12/2013                                           | 09/12/2013                                           | 09/12/2013                                           |
| LQAS data collection mid-term*                                    | 06/11/2014<br>20/11/2015                             | 06/11/2014<br>20/11/2015                             | 06/11/2014<br>20/11/2015                             | 06/11/2014<br>20/11/2015                             | 06/11/2014<br>20/11/2015                             | 06/11/2014<br>20/11/2015                             | 06/11/2014<br>20/11/2015                             | 06/11/2014<br>20/11/2015                             |
| LQAS data collection endline*                                     | 09/30/2016                                           | 09/30/2016                                           | 09/30/2016                                           | 09/30/2016                                           | 09/30/2016                                           | 09/30/2016                                           | 09/30/2016                                           | 09/30/2016                                           |
| Use of Tanahashi model to identify bottlenecks*                   | 27/01/2014<br>04/02/2015<br>10/02/2016               | 27/01/2014<br>04/02/2015<br>10/02/2016               | 27/01/2014<br>04/02/2015<br>10/02/2016               | 27/01/2014<br>04/02/2015<br>10/02/2016               | 27/01/2014<br>04/02/2015<br>10/02/2016               | 27/01/2014<br>04/02/2015<br>10/02/2016               | 27/01/2014<br>04/02/2015<br>10/02/2016               | 27/01/2014<br>04/02/2015<br>10/02/2016               |
| Causal Analysis to identify root causes*                          | 27/01/2014<br>04/02/2015<br>10/02/2016               | 27/01/2014<br>04/02/2015<br>10/02/2016               | 27/01/2014<br>04/02/2015<br>10/02/2016               | 27/01/2014<br>04/02/2015<br>10/02/2016               | 27/01/2014<br>04/02/2015<br>10/02/2016               | 27/01/2014<br>04/02/2015<br>10/02/2016               | 27/01/2014<br>04/02/2015<br>10/02/2016               | 27/01/2014<br>04/02/2015<br>10/02/2016               |
| Other LQAS activities outside of CODES (specify )                 | N                                                    | N                                                    | N                                                    | N                                                    | N                                                    | N                                                    | N                                                    | N                                                    |
| <b>Pillar 2</b>                                                   |                                                      |                                                      |                                                      |                                                      |                                                      |                                                      |                                                      |                                                      |
| Training on the use of management tools                           | 27/01/2014                                           | 27/01/2014                                           | 27/01/2014                                           | 27/01/2014                                           | 27/01/2014                                           | 27/01/2014                                           | 27/01/2014                                           | 27/01/2014                                           |
| Completed causal analysis, based on management checklist*         | 27/01/2014<br>04/02/2015<br>10/02/2016               | 27/01/2014<br>04/02/2015<br>10/02/2016               | 27/01/2014<br>04/02/2015<br>10/02/2016               | 27/01/2014<br>04/02/2015<br>10/02/2016               | 27/01/2014<br>04/02/2015<br>10/02/2016               | 27/01/2014<br>04/02/2015<br>10/02/2016               | 27/01/2014<br>04/02/2015<br>10/02/2016               | 27/01/2014<br>04/02/2015<br>10/02/2016               |
| Documented peer-to-peer mentoring process*                        | 11/02/2013<br>10/12/2014<br>28/10/2015<br>01/11/2016 | 11/02/2013<br>10/12/2014<br>28/10/2015<br>01/11/2016 | 11/02/2013<br>10/12/2014<br>28/10/2015<br>01/11/2016 | 11/02/2013<br>10/12/2014<br>28/10/2015<br>01/11/2016 | 11/02/2013<br>10/12/2014<br>28/10/2015<br>01/11/2016 | 11/02/2013<br>10/12/2014<br>28/10/2015<br>01/11/2016 | 11/02/2013<br>10/12/2014<br>28/10/2015<br>01/11/2016 | 11/02/2013<br>10/12/2014<br>28/10/2015<br>01/11/2016 |
| Documented annual performance assessments* (Development of annual | Y                                                    | Y                                                    | Y                                                    | Y                                                    | Y                                                    | Y                                                    | Y                                                    | Y                                                    |

| Pillar of intervention                                                                                             | Apac                                                       | Arua                                                       | Bugiri                                                     | Buweju                                                     | Buvuma                                                     | Luuka                                                      | Maracha                                                    | Masindi                                                    |
|--------------------------------------------------------------------------------------------------------------------|------------------------------------------------------------|------------------------------------------------------------|------------------------------------------------------------|------------------------------------------------------------|------------------------------------------------------------|------------------------------------------------------------|------------------------------------------------------------|------------------------------------------------------------|
| scorecards)                                                                                                        |                                                            |                                                            |                                                            |                                                            |                                                            |                                                            |                                                            |                                                            |
| Documented situational analysis to identify a) low coverage areas; b) underserved populations; and c) bottlenecks* | Y                                                          | Y                                                          | Y                                                          | Y                                                          | Y                                                          | Y                                                          | Y                                                          | Y                                                          |
| Documented evidence of CQI activity independent of CODES (specify)                                                 | Y – Comprehensive HFQAP                                    | Y – Comprehensive HFQAP                                    | Y – Comprehensive HFQAP                                    | Y – Comprehensive HFQAP                                    | Y – Comprehensive HFQAP                                    | Y – Comprehensive HFQAP                                    | Y – Comprehensive HFQAP                                    | Y – Comprehensive HFQAP                                    |
| <b>Pillar 3**</b>                                                                                                  |                                                            |                                                            |                                                            |                                                            |                                                            |                                                            |                                                            |                                                            |
| Community dialogues (number)**                                                                                     | 17                                                         | 17                                                         | 17                                                         | 17                                                         | 17                                                         | 17                                                         | 17                                                         | 17                                                         |
| Documented use of citizen report cards**                                                                           | Y (Annually)                                               | Y (Annually)                                               | Y (Annually)                                               | Y (Annually)                                               | Y (Annually)                                               | Y (Annually)                                               | Y (Annually)                                               | Y (Annually)                                               |
| Documented use of text message surveys**                                                                           | Y( 2 rounds annually)                                      | Y( 2 rounds annually)                                      | Y( 2 rounds annually)                                      | Y( 2 rounds annually)                                      | Y( 2 rounds annually)                                      | Y( 2 rounds annually)                                      | Y( 2 rounds annually)                                      | Y( 2 rounds annually)                                      |
| Community score card developed**                                                                                   | N                                                          | N                                                          | N                                                          | N                                                          | N                                                          | N                                                          | N                                                          | N                                                          |
| Documented use of U-Report**                                                                                       | Y(2 polls per year)                                        | Y(2 polls per year)                                        | Y(2 polls per year)                                        | Y(2 polls per year)                                        | Y(2 polls per year)                                        | Y(2 polls per year)                                        | Y(2 polls per year)                                        | Y(2 polls per year)                                        |
| Documented use of Rapid-SMS**                                                                                      | N                                                          | N                                                          | N                                                          | N                                                          | N                                                          | N                                                          | N                                                          | N                                                          |
| Documented use of supplemental non-CODES community-based mechanisms (specify)                                      | Y- Policy meetings and involvement of political leadership | Y- Policy meetings and involvement of political leadership | Y- Policy meetings and involvement of political leadership | Y- Policy meetings and involvement of political leadership | Y- Policy meetings and involvement of political leadership | Y- Policy meetings and involvement of political leadership | Y- Policy meetings and involvement of political leadership | Y- Policy meetings and involvement of political leadership |

| <b>Pillar of intervention</b>                                                                          | <b>Apac</b>           | <b>Arua</b>           | <b>Bugiri</b>         | <b>Buweju</b>         | <b>Buvuma</b>         | <b>Luuka</b>          | <b>Maracha</b>        | <b>Masindi</b>        |
|--------------------------------------------------------------------------------------------------------|-----------------------|-----------------------|-----------------------|-----------------------|-----------------------|-----------------------|-----------------------|-----------------------|
| Involvement of additional community-based organizations (CBOs), external to the CODES trial (specify ) | Y (3 CBOs identified) | Y (3 CBOs identified) | Y (3 CBOs identified) | Y (3 CBOs identified) | Y (3 CBOs identified) | Y (3 CBOs identified) | Y (3 CBOs identified) | Y (3 CBOs identified) |

\*Source: CFI Reports and work plan reports

\*\* Source: ACODE Reports and submitted work plan reports

Study findings were disseminated through three national meetings, one written research brief, and one written policy brief. In addition, five of eight planned manuscripts are published in peer-reviewed journals.
