# Supplementary material for: Child health and the implementation of Community and District-management Empowerment for Scale-up (CODES) in Uganda: a randomised controlled trial
Source: BMJ Glob Health. 2021 Jun 8;6(6):e006084. doi: 10.1136/bmjgh-2021-006084 (PMC8189926; doi:10.1136/bmjgh-2021-006084)
Supplement: Supplementary data [file bmjgh-2021-006084supp008.pdf]

Supplement Table 2: Socio-demographic characteristics

|                                                                                          | Observed % (95% CI) |                  |          | Difference in differences (DID) |             |          |
|------------------------------------------------------------------------------------------|---------------------|------------------|----------|---------------------------------|-------------|----------|
|                                                                                          | Intervention        | Comparison       | P-value* | DID change in %                 | 95 % CI     | P-value* |
| <b>Households with children (0-59 months)</b>                                            |                     |                  |          |                                 |             |          |
| <b>Baseline</b>                                                                          | n=663               | n=851            |          |                                 |             |          |
| <b>Endline</b>                                                                           | n=761               | n=757            |          |                                 |             |          |
| <b>Demographic</b>                                                                       |                     |                  |          |                                 |             |          |
| <b>Mother's age</b>                                                                      |                     |                  |          |                                 |             |          |
| <b>Baseline</b>                                                                          | n=665               | n=847            |          |                                 |             |          |
| <b>Endline</b>                                                                           | n=753               | n=752            |          |                                 |             |          |
| <b>Baseline (mean years)</b>                                                             | 29.5 (28.9-30.1)    | 30.7 (29.9-31.5) | 0.029    |                                 |             |          |
| <b>Endline ( mean years)</b>                                                             | 29.0 (28.3-29.7)    | 29.7 (29.1-30.3) | 0.14     | 0.45                            | -0.57,+1.47 | 0.363    |
| <b>Marital status (married*)</b>                                                         |                     |                  |          |                                 |             |          |
| <b>Baseline</b>                                                                          | n=662               | n=850            |          |                                 |             |          |
| <b>Endline</b>                                                                           | n=758               | n=754            |          |                                 |             |          |
| <b>Baseline</b>                                                                          | 87.9 (84.5-90.7)    | 88.5 (85.8-90.7) | 0.78     |                                 |             |          |
| <b>Endline</b>                                                                           | 89.1 (86.1-91.5)    | 85.8 (80.8-89.7) | 0.19     | 3.8                             | -3.1,+10.7  | 0.261    |
| <b>Socio-economic</b>                                                                    |                     |                  |          |                                 |             |          |
| <b>Household of a child aged 0-59 months with roofing (asbestos, iron sheets, tiles)</b> |                     |                  |          |                                 |             |          |
| <b>Baseline</b>                                                                          | n=663               | n=851            |          |                                 |             |          |
| <b>Endline</b>                                                                           | n=761               | n=757            |          |                                 |             |          |
| <b>Baseline</b>                                                                          | 47.8 (35.9-60.0)    | 66.0 (54.2-76.2) | 0.034    |                                 |             |          |
| <b>Endline</b>                                                                           | 59.8 (48.6-70.0)    | 67.1 (55.2-77.2) | 0.35     | 10.9                            | 4.2,17.6    | 0.003    |
| <b>Household of a child aged 0-59 months with electricity</b>                            |                     |                  |          |                                 |             |          |
| <b>Baseline</b>                                                                          | 5.7 (3.2-10.0)      | 9.6 (5.8-15.5)   | 0.16     |                                 |             |          |
| <b>Endline</b>                                                                           | 21.2 (16.6-26.5)    | 23.1 (18.6-28.3) | 0.58     | 1.9                             | -10.0,+13.9 | 0.734    |
| <b>Mothers inability to read</b>                                                         |                     |                  |          |                                 |             |          |
| <b>Baseline</b>                                                                          | n=663               | n=851            |          |                                 |             |          |
| <b>Endline</b>                                                                           | n=761               | n=757            |          |                                 |             |          |

|                            |                  |                  |      |     |            |       |
|----------------------------|------------------|------------------|------|-----|------------|-------|
| <b>Baseline</b>            | 40.0 (35.2-45.0) | 38.3 (33.3-43.6) | 0.65 |     |            |       |
| <b>Endline</b>             | 40.3 (35.8-45.1) | 37.0 (31.7-42.6) | 0.36 | 1.7 | -8.0,+11.3 | 0.714 |
|                            |                  |                  |      |     |            |       |
| <b>Household has Radio</b> |                  |                  |      |     |            |       |
| <b>Baseline</b>            | 62.0 (57.2-66.5) | 67.1 (62.4-71.5) | 0.12 |     |            |       |
| <b>Endline</b>             | 54.0 (48.6-59.4) | 58.7 (54.7-62.5) | 0.17 | 0.5 | -9.3,+10.2 | 0.921 |

\*Study design adjusted

\*\*Includes co-habiting
